# Supplementary material
Source: MDPI journal article supplement (https://www.mdpi.com/2073-4352/8/11/436)
Supplement: s1 [file s1]

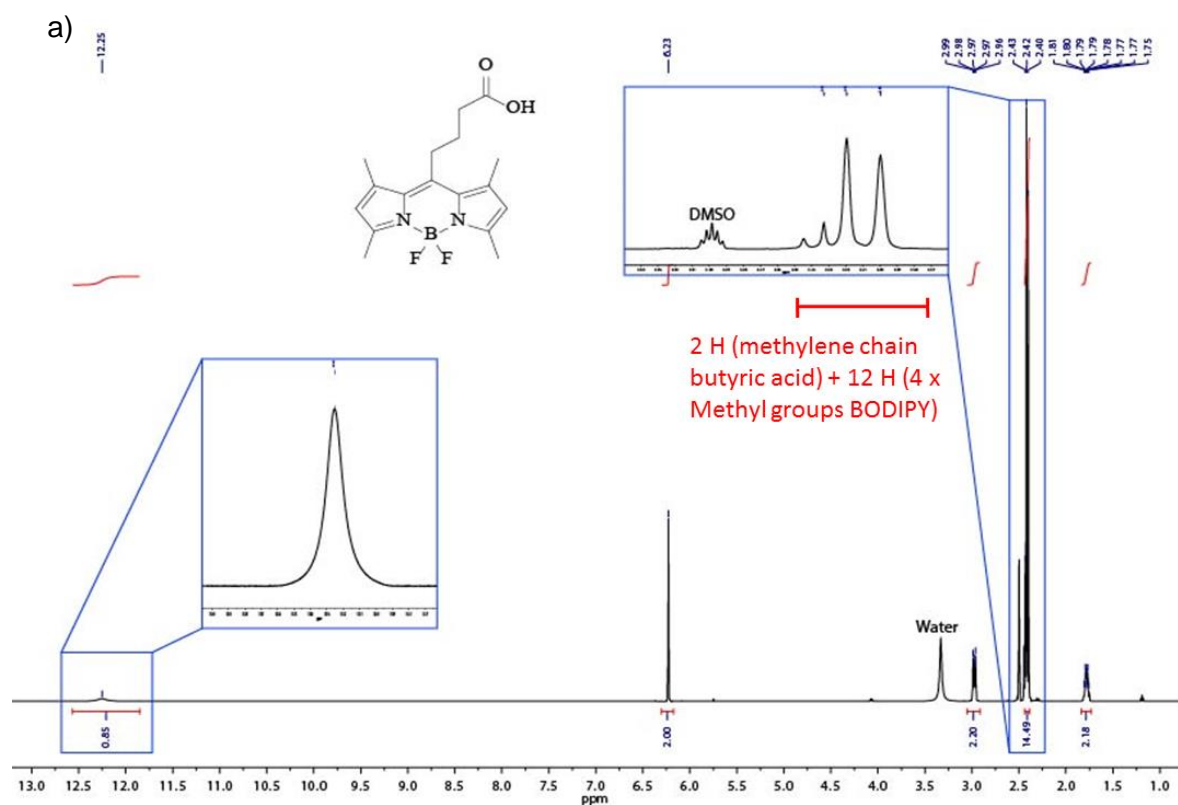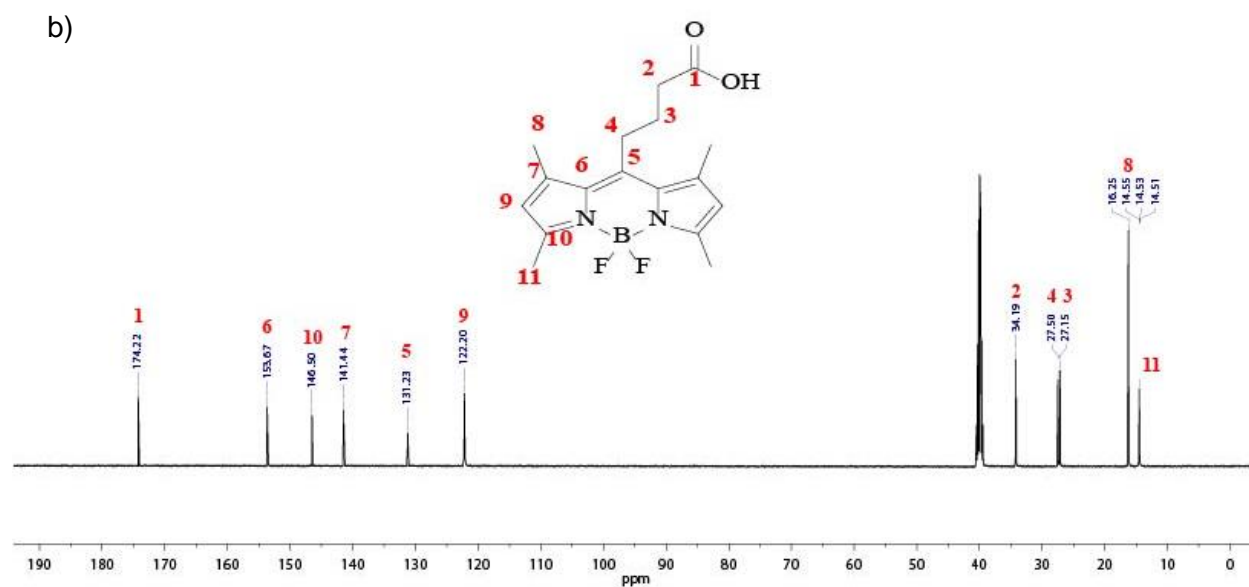

**Figure S1.** a)  $^1\text{H}$ -NMR spectrum (600 MHz) and b)  $^{13}\text{C}$ -NMR spectrum (150 MHz) of **1** in  $\text{DMSO}-d_6$  at 298 K

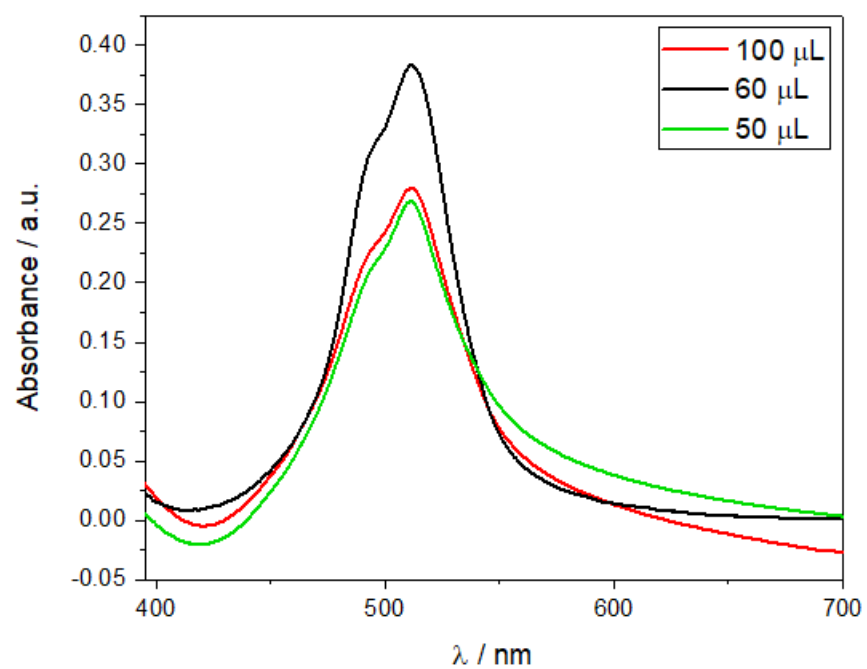

**Figure S2.** UV/Vis absorption spectra of compound **1** at 298 K in thin film. Different volumes of a MeOH solution of **1** ( $c = 1 \times 10^{-3}$  M) were drop cast on the quartz plate.
